# Supplementary material for: Metallo-phosphorylation of alkynes: reaction of alkynes with Cp2Zr(1-butene)(PR3) and chlorophosphateElectronic supplementary information (ESI) available: experimental procedures and NMR data. See http://www.rsc.org/suppdata/cc/b3/b308595c/
Source: Royal Society of Chemistry journal article supplement (doi:10.1039/b308595c), 2003-01-01
Supplement: b308595c.doc [file b308595c.doc]

# Supplementary Material

*for*

Metallo-Phosphorylation of Alkynes: Reaction of Alkynes with Cp2Zr(1-butene)(PR3) and Chlorophosphate

Chunbo Lai, Chanjuan Xi*, Chao Chen, Mingming Ma, Xiaoyin Hong

Key Laboratory for Bioorganic Phosphorus Chemistry of Ministry of Education, Department of Chemistry, Tsinghua University, Beijing, 100084, China

Experimental Procedure and NMR data:

All reactions were carried out in pre-dried Schlenk tube and under nitrogen with a slightly positive pressure. Unless otherwise noted, all starting materials were commercially available and were used without further purification. Tetrahydrofuran (THF) was refluxed and distilled from sodium and benzophenone under a nitrogen atmosphere. Diethyl chlorophosphate was prepared by the reaction of phosphorus oxychloride and ethanol according literature. 1H NMR and 13C NMR spectra were recorded on JOEL 300 NMR spectrometer with TMS as internal standard. 31P NMR spectra were recorded on Bruker 200 NMR spectrometer using 85% H3PO4(δp= 0) as an internal standard. Mass spectra were obtained on Esquire-LC mass spectrometer. GC analysis was performed on SHIMADZU GC-14B equipped with fused silica capillary column. Appropriate alkanes were used as internal standards.

**Representative procedure for the Preparation of 2-Phenyl-2-bis(cyclopentadienyl)zirconium-(*Z*)-vinylphosphonate (1a):** To a solution of Cp2ZrCl2 (1.2mmol, 351mg)in 5mL THF, n-BuLi (2.4mmol, 1.53mL, 1.57M in hexane)was added at –78oC and was stirred for 1h at the same temperature. To this solution, PMe3(1.5mmol, 1.5mL, 1M in hexane) was added by means of syringe. The mixture was warmed up to room temperature and was stirred for 1h. Then phenylacetylene(1.0mmol, 110μL) was added and was stirred 3h at the same temperature. After the (EtO)2P(O)Cl (1.2mmol, 172μL)was added, the solution was warmed up to 50oC and stirred for 6h. Concentrated the reaction system by removing the solvent of THF at the reduced pressure and then put the concentrating solution in C6D6. 1H NMR(C6D6) δ 1.16-1.12 (w, 6H), 4.00-4.16 (w, 4H), 6.04 (t,1H), 6.09 (s, 10H), 7.15 (w, 1H); 13C NMR(C6D6) δ 16.2, 62.4, 114.3 (Cp), 120.7 (d, 2*J*PC = 166.1 Hz, Ph(Cp2Zr)C=CHP), 135.6 (d, 3*J*PC = 24.3 Hz, quaternary carbon of Ph), 187.2 (Ph(Cp2Zr)C=CHP); 31P NMR(THF, 85% H3PO4) δ 41.7, 20.5.

**Diethyl-(*E*)-2-phenyl-ethenylphosphonate (2a):** The resulting mixture of **1a** was treated with 3N HCl. Product was extract with ethyl acetate and the organic extract was dried over MgSO4. Removing the solvent and subsequent purification by column chromatography silica gel (ethyl acetate/petroleum ether=3/1) afforded 194mg of the title compound as a colorless liquid. 1H NMR(CDCl3, Me4Si) δ 1.32 (t, 3*J*HH = 6.6 Hz, 6H), 4.03-4.16 (m, 4H), 6.28 (t, 2*J*PH = 17.4 Hz, 3*J*HH = 17.4 Hz, PhCH=CHP), 7.28-7.58 (m, 6H, PhCH=CHP and 5H of Ph); 13C NMR(CDCl3, Me4Si) δ 16.5(d, 3*J*PC = 5.6 Hz), 62.0 (d, 2*J*PC = 4.5 Hz), 114.1 (d, 1*J*PC = 193.4 Hz, PhCH=CHP), 127.8, 128.9, 130.3, 134.8 (d, 3*J*PC = 23.0 Hz, quaternary-carbon-of-Ph), 148.8 (d, 2*J*PC = 5.6 Hz, PhCH=CHP, ); 31P NMR(CDCl3, 85%H3PO4) δ 20.2. ESI-MS(+), *m/z* = 241.0 (M+H+), 263.0 (M+Na+). The analytical data is identical with literature1

**Diethyl-(*E*)-1-phenyl-2-phenyl-ethenylphosphonate (2b):**

The reaction was carried out in a similar way to that described above, using PMePh2 instead of PMe3. Isolated yield: 69%, GC yield: 78%. 1H NMR(CDCl3, Me4Si) δ 1.28 (t, 3*J*HH = 7.1 Hz, 6H), 4.08-4.12 (m, 4H), 7.04-7.34 (m, 10H), 7.63 (d, 3*J*PH = 24.6 Hz, PhCH=CPhP); 13C NMR(CDCl3, Me4Si) δ 16.3 (d, 3*J*PC = 6.3 Hz), 62.2 (d, 2*J*PC = 5.6 Hz), 127.7, 128.1, 128.8, 128.9, 129.1, 130.3, 131.0 (1*J*PC = 179.8Hz, PhCH=CPhP), 135.6 (2*J*PC = 7.5 Hz, quaternary-carbon-of-Ph), 134.7(3*J*PC = 23.0 Hz, quaternary-carbon-of-Ph), 143.7 (2*J*PC = 11.2 Hz, PhCH=CPhP); 31P NMR(CDCl3, 85%H3PO4) δ 18.3. ESI-MS(+), *m/z* = 317.2 (M+H+), 339.1 (M+Na+); HMRS calcd for C18H21O3P: 316.1228, found: 316.1227.

**Diethyl-(*E*)-2-hexyl-ethenylphosphonate (2c):** Isolated yield; 55%, GC yield: 80%. 1H NMR(CDCl3, Me4Si) δ 0.86-0.96 (m, 3H), 1.28-1.67 (m, 14H), 2.22 (m, 2H), 4.07 (m, 4H), 5.63 (dd, 1H, 2*J*PH = 20.1Hz, 3*J*HH = 17.3 Hz, CH3(CH2)5CH=CHP), 6.78 (m, 3*J*PH = 21.9 Hz, 3*J*HH = 17.3Hz, CH3(CH2)5CH=CHP); 13C NMR(CDCl3, Me4Si), 14.0, 16.4 (d, 3*J*PC = 5.6 Hz), 22.6, 27.8, 28.8, 31.6, 34.2 (d, 3*J*PC = 21.9 Hz), 61.6 (d, 2*J*PC = 5.0 Hz), 116.5 (d, 1*J*PC = 186.5, CH3(CH2)5CH=CP), 154.0 (d, 2*J*PC = 8.1 Hz, Hex-CH=CP); 31P NMR(CDCl3, 85%H3PO4) δ 18.9, ESI-MS(+), *m/z* = 249.2 (M+H+), 271.1 (M+Na+); HRMS calcd for C12H25O3P: 248.1541, found: 248.1548.

**Diethyl-(*E*)--2-TMS-ethenylphosphonate (2d):** Isolated yield: 46%, GC yield: 75%. 1H NMR(CDCl3, Me4Si) δ 0.01 (s, 9H), 1.29 (t, 3*J*HH = 7.7 Hz, 6H), 4.00-3.90 (m, 4H), 6.20 (dd, 2*J*PH = 28.8 Hz, 3*J*HH = 20.7 Hz, TMSCH=CHP), 7.05 (dd, 3*J*PH = 34.2 Hz, 3*J*HH = 20.7 Hz, TMSCH=CHP); 13C NMR(CDCl3, Me4Si) δ 2.0, 16.4 (d, 3*J*PC = 5.6 Hz), 61.8 (d, 2*J*PC = 5.6Hz), 132.1 (d, 1*J*PC = 175.5 Hz, TMSCH=CHP), 156.0 (d, 2*J*PC = 6.2 Hz, TMSCH=CHP). 31P NMR(CDCl3, 85%H3PO4) δ 17.8. ESI-MS(+), *m/z* = 237.0 (M+H+), 259.0 (M+Na+); HRMS calcd for C9H21O3PSi: 236.0998, found: 236.0992.

**Diethyl-(*E*)-1-ethyl-2-ethyl-ethenylphosphonate (2e):** Isolated yield: 33%, GC yield: 45%. 1H NMR(CDCl3, Me4Si) δ 1.06 (t, 3*J*HH = 7.5 Hz, 6H), 1.32 (t, 3*J*HH = 6.9 Hz, 6H), 2.17-2.32 (m, 4H), 4.03-4.16 (m, 4H), 6.53 (dt, 3*J*PH = 23.7 Hz, 3*J*HH = 7.2 Hz, CH3CH2CH=CPCH2CH3); 13C NMR(CDCl3, Me4Si) δ 13.3(d, 3*J*PC = 1.8 Hz), 14.1(d, 4*J*PC = 1.9 Hz), 16.4(d, 2C, 3*J*PC = 6.2 Hz), 20.5(d, 2*J*PC = 10.6 Hz), 21.7 (d, 3*J*PC = 19.9 Hz), 61.5(d, 2C, 2*J*PC = 5.6 Hz), 130.1 (d, 1*J*PC = 175.3 Hz, CH3CH2CH=CPCH2CH3), 148.5 (d, 2*J*PC = 10.6 Hz, CH3CH2CH=CPCH2CH3); 31P NMR(CDCl3, 85%H3PO4) δ 23.1, ESI-MS(+), *m/z* = 221.0 (M+H+), 243.0 (M+Na+); HRMS calcd for C10H21O3P: 220.1228, found: 220.1223.

**Diethyl-(*E*)-1-propyl-2-propyl-ethenylphosphonate (2f):** Isolated yield: 40%, GC yield: 51%. 1H NMR(CDCl3, Me4Si) δ 0.88-0.96 (m, 6H), 1.34 (t, 3*J*HH = 7.5 Hz, 6H), 1.41-1.52 (m, 4H), 2.12-2.28 (m, 4H), 3.99-4.16 (m, 4H), 6.57 (dt, 3*J*PH = 24.0 Hz, 3*J*HH = 7.2 Hz, CH3CH2CH2CH=CPCH2CH2CH3); 13C NMR(CDCl3, Me4Si) δ 13.9, 14.2, 16.3 (d, 3*J*PC = 6.2 Hz), 21.9 (d, 3*J*PC = 1.9 Hz), 22.5 (d, 4*J*PC = 1.3 Hz), 29.4 (d, 2*J*PC = 10.6 Hz), 30.6 (d, 3*J*PC = 19.3 Hz), 61.4(d, 2*J*PC = 5.6 Hz), 129.2(d, 1*J*PC = 174.7 Hz, CH3CH2CH=CPCH2CH3), 147.4(d, 2*J*PC = 10.0 Hz, CH3CH2CH2CH=CPCH2CH2CH3); 31P NMR(CDCl3, 85%H3PO4) δ 23.2. ESI-MS(+), *m/z* = 249.1 (M+H+), 271.1 (M+Na+). The analytical data is identical with literature2

**Diethyl-(*E*)-2-deuterium-2-phenyl-ethenylphosphonate (3a):** The reaction was carried out in a similar way to that described above using DCl instead of 3N HCl to quench the reaction mixture and stirred for 12h. Isolated yield: 70%, GC yield: 92%. 1H NMR(CDCl3, Me4Si) δ 1.34 (m, 6H), 4.10 (q, 4H, 3*J*HH = 7.2 Hz), 6.26 (d, 2*J*PH = 17.4 Hz, PhCD=CHP), 7.37-7.51 (m, 5H); 13C NMR(CDCl3, Me4Si), 16.4 (d, 3*J*PC = 6.8 Hz), 61.9 (d, 2*J*PC = 5.0 Hz), 113.7 (d, 1*J*PC = 191.5 Hz, PhCD=CHP), 127.7, 128.9, 130.3, 134.8 (d, 3*J*PC = 23.0 Hz, quaternary-carbon-of-Ph), 148.5(dt, 2*J*PC = 6.9 Hz, 1*J*CD = 24.1 Hz, PhCD = CHP ); 31P NMR(CDCl3, 85%H3PO4) δ 20.2. ESI-MS(+), *m/z* = 242.1 (M+H+), 264.1 (M+Na+); HRMS calcd for C12H23DO3P: 241.0977, found:241.0972.

**Diethyl-(*Z*)-2-iodo-2-phenyl-ethenylphosphonate (4a):** After addition of CuCl (1.0mmol, 99mg) to the reaction mixture of **1a** at room temperature, I2 (1.2mmol, 305mg) was added and the reaction mixture was stirred at room temperature for 3h. The resulting mixture was treated with 3N HCl at 0oC. Product was extract with ethyl acetate and the organic extract was dried over MgSO4. Removing the solvent and subsequent purification by column chromatography silica gel(ethyl acetate/petroleum ether=3/1) yield 256mg of the title compound. 1H NMR(CDCl3, Me4Si) δ 1.40 (t, 6H, 3*J*HH = 7.2 Hz), 4.22 (m, 4H, 3*J*HH = 7.2 Hz), 6.80 (dd, 2*J*PH = 10.5 Hz, 4*J*HH = 0.06 Hz, PhCI=CHP), 7.32-7.54 (m, 5H); 13C NMR(CDCl3, Me4Si) δ 16.4 (d, 3*J*PC = 6.2 Hz), 62.4(d, 2*J*PC = 6.2 Hz), 120.23(PhCI=CHP ), 127.3 (d, 1*J*PC = 199.6 Hz, PhCI=CHP), 128.3, 128.5, 130.1, 143.4(d, 3*J*PC = 19.8 Hz, quaternary-carbon-of-Ph); 31P NMR(CDCl3, 85%H3PO4) δ 13.5. ESI-MS(+), *m/z* = 367.0(M+H+); HRMS calcd for C12H16IO3P: 365.9882, found: 365.9875.

**Diethyl-(*Z*)-2-bromo-2-phenyl-ethenylphosphonate (5a):** The reaction was carried out in a similar way to that described above using NBS instead of I2. After adding the NBS, the reaction mixture was stirred for 12h at room temperature. 1H NMR(500M, CDCl3, Me4Si) δ 1.34 (t, 6H, 3*J*HH = 7.5 Hz), 4.20-4.24 (m, 4H), 6.67 (d, 2*J*PH = 9.5 Hz, PhCBr=CHP), 7.38-7.69 (m, 5H); 13C NMR(125M, CDCl3, Me4Si) δ 16.4(d, 3*J*PC = 6.3 Hz), 62.4, 119.1 (d, 1*J*PC = 198.9 Hz, PhCBr=CHP), 127.8, 128.5, 130.6, 134.8 (d, 3*J*PC = 16.8 Hz, quaternary-carbon-of-Ph), 141.6(PhCBr=CHP). 31P NMR(CDCl3, 85%H3PO4) δ 13.6. ESI-MS(+), *m/z* = 341.1 (M+Na+, 79Br), 343.1 (M+Na+, 81Br); 319.1 (M+H+, 79Br), 321.1 (M+H+, 81Br), HRMS calcd for C12H16BrO3P: 318.0020(79Br), 320.0000(81Br), found:318.0029(79Br), 320.0007(81Br).

**Diethyl-(*Z*)-2-chloro-2-phenyl-ethenylphosphonate (6a):** The reaction was carried out in a similar way to that described above using NCS instead of I2 . After adding the NCS, the reaction mixture was stirred for 12h at room temperature. 1H NMR(500M, CDCl3, Me4Si) δ 1.34 (t, 6H, 3*J*HH = 7.5 Hz), 4.12-4.24 (m, 4H), 6.41 (d, 2*J*PH = 9.5 Hz, PhCCl=CHP), 7.32-7.69 (m, 5H); 13C NMR(125M, CDCl3, Me4Si) δ 16.4 (d, 3*J*PC = 6.3 Hz), 62.5(d, 2*J*PC = 5.3 Hz), 114.2 (d, 1*J*PC= 196.5 Hz, PhCCl=CHP), 127.0, 128.6, 130.9, 136.8(d, 3*J*PC = 16.3 Hz, quaternary-carbon-of-Ph), 149.7(PhCCl=CHP). 31P NMR(CDCl3, 85%H3PO4) δ 13.6. ESI-MS(+), *m/z* = 297.1 (M+Na+, 35Cl), 299.0 (M+Na+, 37Cl); 275.1 (M+H+, 35Cl), 277.1(M+H+, 37Cl); HRMS calcd for C12H16ClO3P: 274.0526(35Cl), 276.0496(37Cl), found: 274.0532(35Cl), 276.0491(37Cl).

**Diethyl-(*E*)-2-allyl-2-phenyl-ethenylphosphonate (7a):** The reaction was carried out in a similar way to that described above using allyl chloride instead of I2 . After adding the allyl chloride, the reaction mixture was stirred for 12h at room temperature. 1H NMR(500M, CDCl3, Me4Si) δ 1.35 (t, 6H, 3*J*HH = 6.9 Hz), 3.80 (d, 2H, 3*J*HH = 4.0 Hz), 4.16-4.10 (m, 4H), 5.01 (d, 1H, 3*J*HH = 10.0 Hz, CH2=CHCH2(Ph)C=CHP), 5.11 (d, 1H, 3*J*HH = 17.0 Hz, CH2=CHCH2(Ph)C=CHP), 5.79 (m, 1H, 3*J*HH = 10.0 Hz, 3*J*HH = 17.0 Hz, CH2=CHCH2(Ph)C=CHP), 5.89 (d, 1H, 2*J*PH = 15.5 Hz, CH2=CHCH2(Ph)C=CHP), 7.45-7.27 (m, 5H); 13C NMR(125.76M, CDCl3, Me4Si) δ 16.4 (d, 3*J*PC = 6.3 Hz), 36.6 (d, 3*J*PC = 9.1 Hz), 61.6 (d, 2*J*PC = 5.3 Hz), 114.7(d, 1*J*PC = 190.0 Hz, CH2=CHCH2(Ph)C=CHP), 117.0 (CH2=CHCH2(Ph)C=CHP), 126.6, 128.5, 129.0, 134.9(CH2=CHCH2(Ph)C=CHP), 140.7(d, 3*J*PC = 23.0 Hz, tertiary-carbon-in-Ph), 160.1(d, 2*J*PC = 7.6 Hz, CH2=CHCH2(Ph)C=CHP); 31P NMR(CDCl3, 85%H3PO4) δ 17.7. ESI-MS(+), *m/z*=281.0(M+H+), 302.9 (M+Na+); HRMS calcd for C15H21O3P: 280.1228, found: 280.1238.

**Diethyl-(*Z*)-2-phenyl-2-benzoyl-ethenylphosphonate (8a):** The reaction was carried out in a similar way to that described above using benzoyl chloride instead of I2. After adding the benzoyl chloride, the reaction mixture was stirred for 12h at room temperature.1H NMR(CDCl3, Me4Si) δ 1.34 (t, 6H, 3*J*HH = 6.9 Hz), 4.16-3.94 (m, 4H), 6.32 (d, 2*J*PH = 14.1 Hz, PhCO(Ph)C=CHP), 8.07-7.27 (m, 10H).13C NMR(CDCl3, Me4Si) δ 16.1(d, 3*J*PC = 6.2 Hz), 62.2(d, 2*J*PC=5.6Hz), 115.2(d, 1*J*PC = 190.9 Hz, PhCO(Ph)C=CHP), 126.7, 128.8, 129.1, 129.6, 130.3, 133.7, 135.3 (d, 3*J*PC = 21.8 Hz, quaternary-carbon-of-Ph), 136.0 (quaternary-carbon-of-Ph in PhCO), 157.7 (2*J*PC = 7.2 Hz, PhCO(Ph)C=CHP), 195.9(3*J*PC = 7.5 Hz, PhCO(Ph)C=CHP); 31P NMR(CDCl3, 85%H3PO4) δ 14.7, ESI-MS(+), *m/z* = 345.3 (M+H+), 367.1 (M+Na+)\; HRMS calcd for C19H21O4P: 344.1177, found: 344.1170.

**References**

1. (a) T.Yokomastu, T. Yamagishi, K. Suemune, Y. Yoshida, S. Shibuya, *Tetrahedron* **1998**, *54*, 767-780. (b) Janecki, T. Waszkuc, R. Bodalski, *Synthesis* **1984**, 1025.

2. N. Mimouni, E. About-Jaudet, N. Collignon, *Synth Commun*, **1991**, *21*, 2341.
